# Supplementary material for: NMR-Based Metabolomics Demonstrates a Metabolic Change during Early Developmental Stages from Healthy Infants to Young Children
Source: MDPI journal article supplement (doi:10.3390/metabo13030445), 2023-03-18
Supplement: s1 [file s1]

# Supplemental material

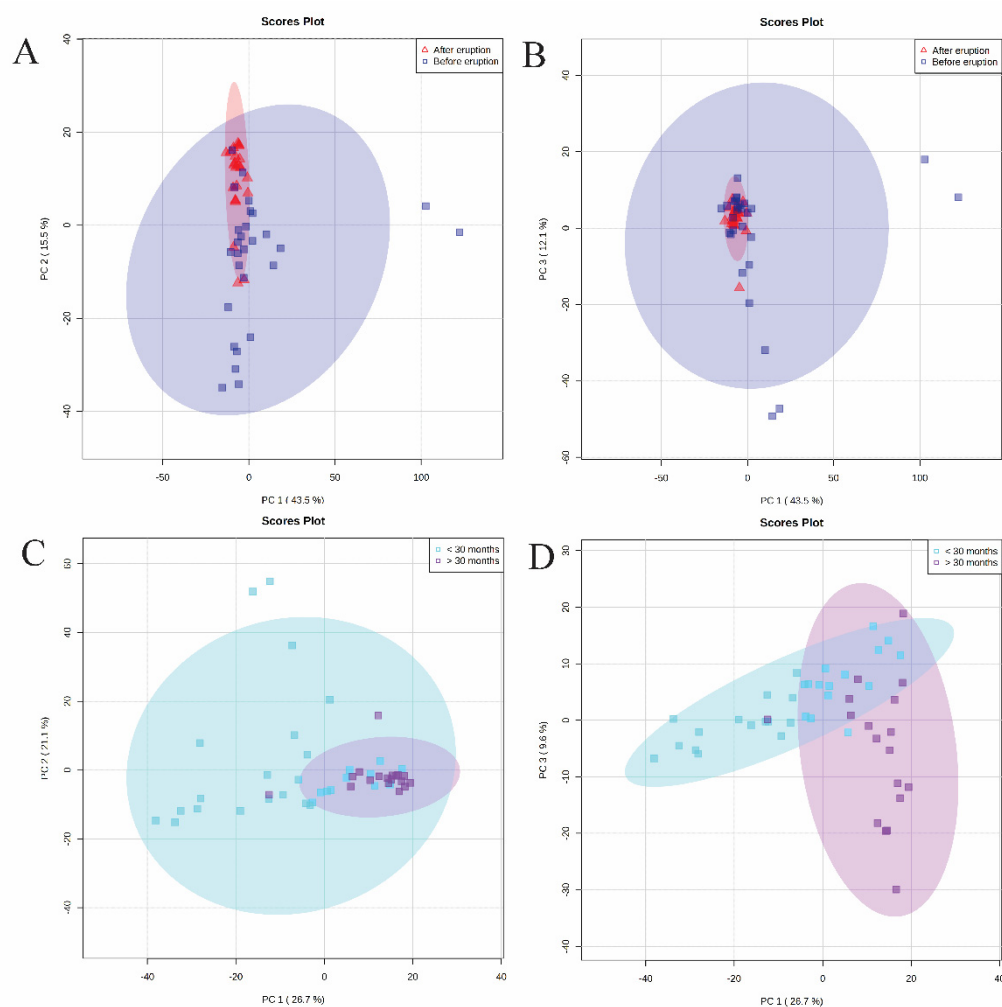

Figure S1: PCA analysis of NMR data. (A) PCA considering PC1 x PC2 and (B) PCA considering PC1 x PC3 of infants and children before and after tooth eruption; (C) PCA considering PC1 x PC2 and (D) PCA considering PC1 x PC3 of infants and children <30 and > 30 months.
